# Supplementary material
Source: PubMed Central journal article supplement (PMC6375797)
Supplement: NIHMS1518635-supplement-Supplemental_Data_File___doc___tif__pdf__etc___1.pdf [file NIHMS1518635-supplement-Supplemental_Data_File___doc___tif__pdf__etc___1.pdf]

# Supplemental Figure 1: Receiver Operating Curve for Outcome of HIV Seroconversion at Urine Tenofovir Concentration Cut-Offs

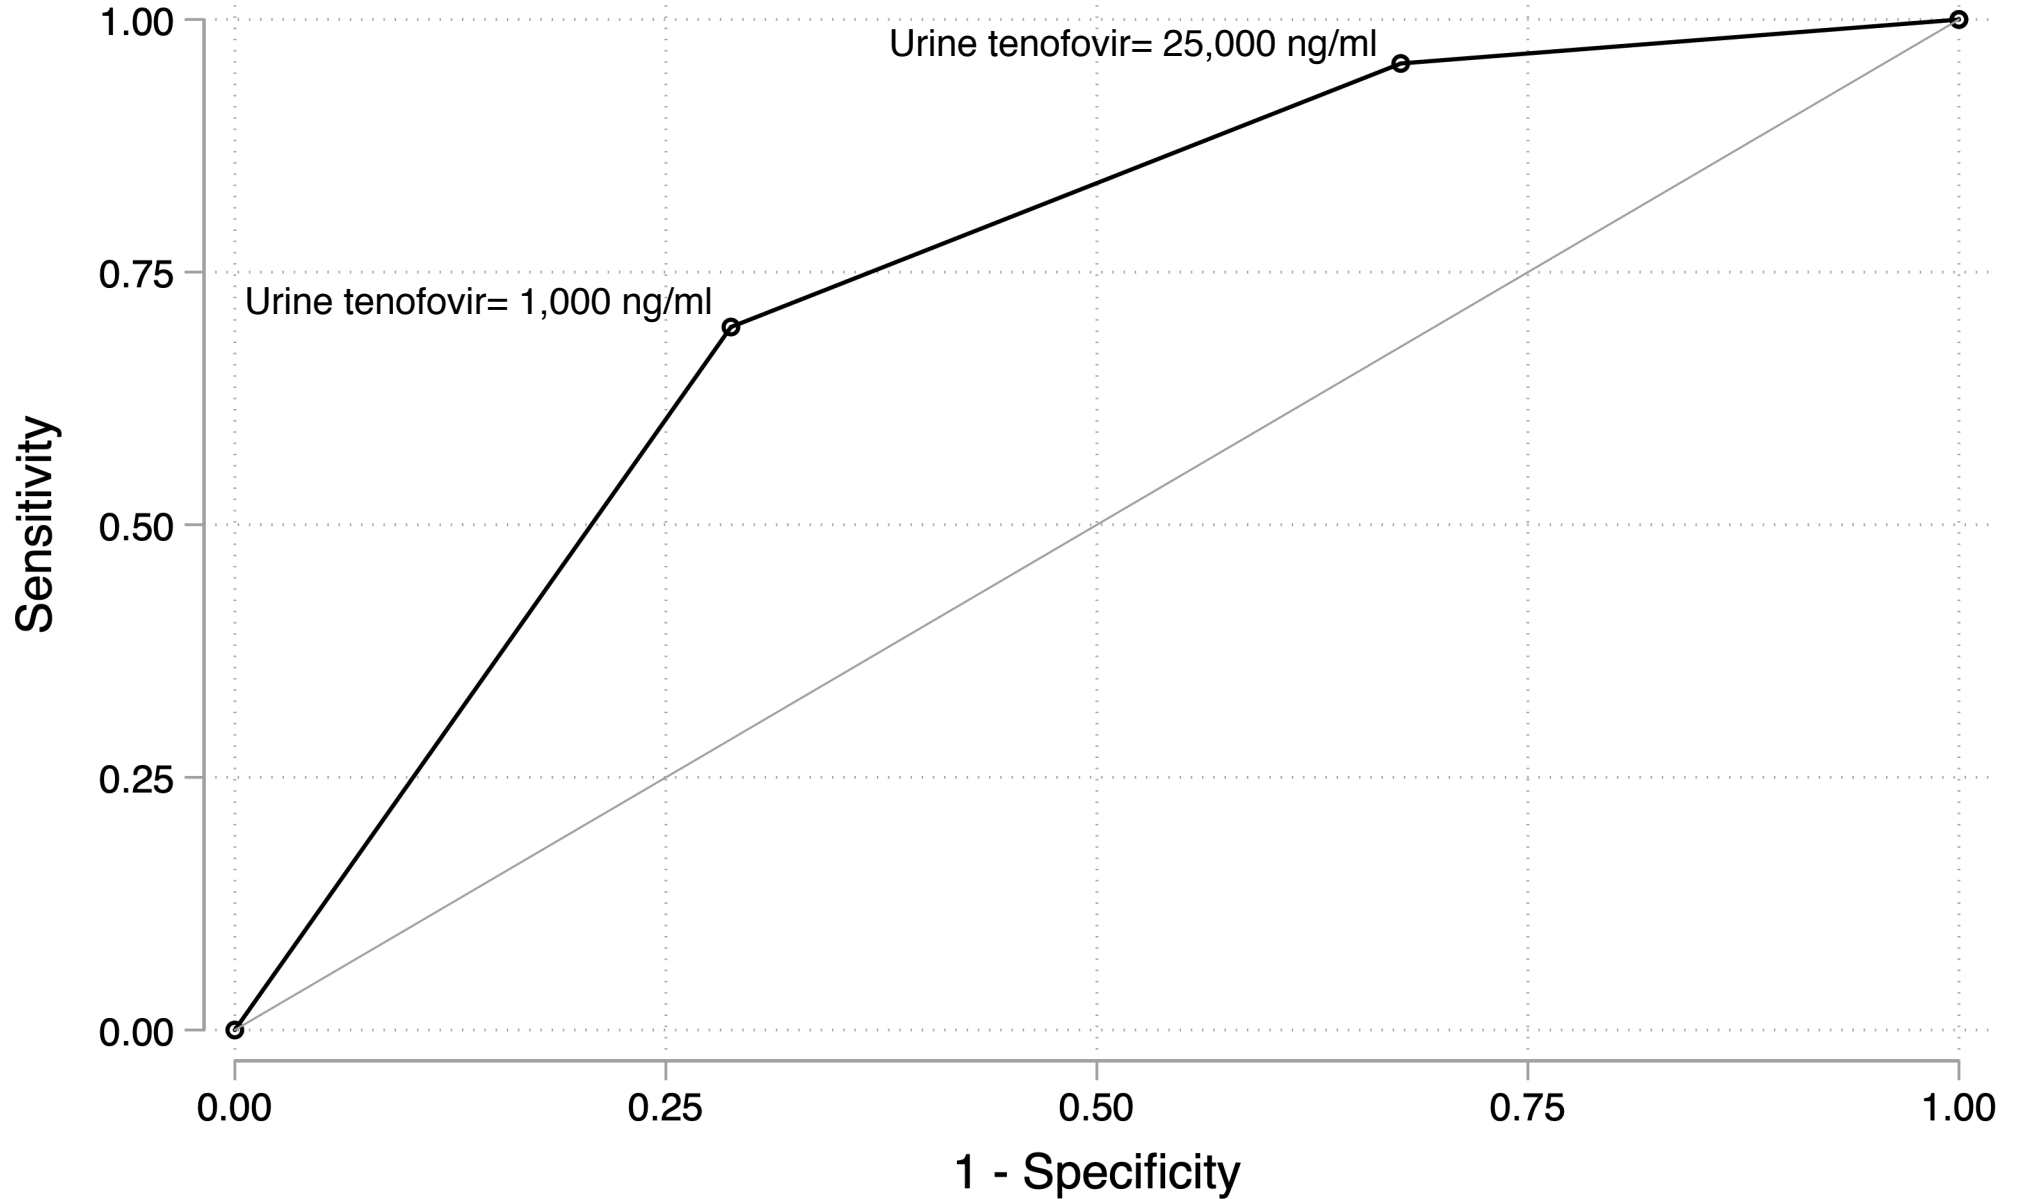

Area under ROC curve = 0.7377
