# Supplementary material
Source: PubMed Central journal article supplement (PMC6375797)
Supplement: NIHMS1518635-supplement-Supplemental_Data_File___doc___tif__pdf__etc___2.pdf [file NIHMS1518635-supplement-Supplemental_Data_File___doc___tif__pdf__etc___2.pdf]

## Supplemental Figure 2: Two by Two Table of Urine Immunoassay Results Compared to Dried Blood Spot (DBS) Dosing Cut-Offs

|                                                    |       | DBS Undetectable<br>( $<3.5$ fmol/punch) |                            |
|----------------------------------------------------|-------|------------------------------------------|----------------------------|
|                                                    |       | Below                                    | Above                      |
| Urine Immunoassay Undetectable<br>( $<1000$ ng/ml) | Below | 23<br>Sensitivity:<br>100%               | 24                         |
|                                                    | Above | 0                                        | 105<br>Specificity:<br>81% |

|                                                    |       | DBS estimated $<2$ doses/week<br>( $<350$ fmol/punch) |                           |
|----------------------------------------------------|-------|-------------------------------------------------------|---------------------------|
|                                                    |       | Below                                                 | Above                     |
| Urine Immunoassay Undetectable<br>( $<1000$ ng/ml) | Below | 41<br>Sensitivity:<br>69%                             | 6                         |
|                                                    | Above | 18                                                    | 87<br>Specificity:<br>94% |
